# Supplementary material for: Demographic, Knowledge and Impact Analysis of 57,627 Antibiotic Guardians Who Have Pledged to Contribute to Tackling Antimicrobial Resistance
Source: MDPI journal article supplement (doi:10.3390/antibiotics8010021), 2019-03-09
Supplement: s1 [file s1]

**S1 Table.** Antibiotic Guardian rate by CCG per 100,000 population with 95% confidence intervals

| CCG Code | CCG                                                    | Rates per 100,000 | LowerCI | UpperCI |
|----------|--------------------------------------------------------|-------------------|---------|---------|
| 06H      | NHS Castle Point and Rochford CCG                      | 9                 | 5       | 15      |
| 00J      | NHS Nottingham North and East CCG                      | 16                | 10      | 24      |
| 06V      | NHS North Norfolk CCG                                  | 16                | 11      | 23      |
| 04R      | NHS Thurrock CCG                                       | 23                | 16      | 31      |
| 02A      | NHS West Norfolk CCG                                   | 23                | 17      | 32      |
| 05J      | NHS South Lincolnshire CCG                             | 23                | 16      | 32      |
| 09F      | NHS Great Yarmouth and Waveney CCG                     | 25                | 19      | 32      |
| 12F      | NHS Fylde and Wyre CCG                                 | 26                | 19      | 34      |
| 01F      | NHS Havering CCG                                       | 27                | 21      | 34      |
| 06L      | NHS Lincolnshire East CCG                              | 28                | 22      | 36      |
| 05R      | NHS Swale CCG                                          | 29                | 20      | 41      |
| 04F      | NHS North Lincolnshire CCG                             | 30                | 22      | 39      |
| 99F      | NHS Corby CCG                                          | 30                | 19      | 46      |
| 04N      | NHS South Tyneside CCG                                 | 31                | 23      | 41      |
| 14L      | NHS North East Essex CCG                               | 31                | 25      | 38      |
| 10Q      | NHS South East Staffordshire and Seisdon Peninsula CCG | 31                | 25      | 40      |
| 05D      | NHS Fareham and Gosport CCG                            | 32                | 24      | 41      |
| 09W      | NHS North East Lincolnshire CCG                        | 32                | 24      | 42      |
| 02P      | NHS Barnsley CCG                                       | 33                | 26      | 41      |
| 02G      | NHS South Norfolk CCG                                  | 33                | 26      | 41      |
| 06D      | NHS Morecambe Bay CCG                                  | 34                | 28      | 41      |
| 99E      | NHS Basildon and Brentwood CCG                         | 34                | 27      | 42      |
| 10R      | NHS South Eastern Hampshire CCG                        | 35                | 27      | 44      |
| 02Y      | NHS Erewash CCG                                        | 35                | 24      | 49      |
| 15A      | NHS Bexley CCG                                         | 36                | 29      | 44      |
| 09A      | NHS Coventry and Rugby CCG                             | 36                | 31      | 42      |
| 08N      | NHS South Kent Coast CCG                               | 37                | 29      | 46      |
| 04E      | NHS North East Hampshire and Farnham CCG               | 37                | 30      | 47      |
| 10X      | NHS Telford and Wrekin CCG                             | 38                | 29      | 48      |
| 08T      | NHS Warwickshire North CCG                             | 39                | 31      | 49      |
| 08R      | NHS North Hampshire CCG                                | 39                | 31      | 48      |
| 05W      | NHS Walsall CCG                                        | 39                | 32      | 47      |
| 05A      | NHS Doncaster CCG                                      | 40                | 33      | 48      |
| 09N      | NHS Hastings and Rother CCG                            | 40                | 31      | 50      |
| 03W      | NHS Enfield CCG                                        | 40                | 33      | 47      |
| 02Q      | NHS Bassetlaw CCG                                      | 40                | 30      | 54      |
| 00C      | NHS Durham Dales, Easington and Sedgfield CCG          | 41                | 34      | 49      |
| 05N      | NHS Southend CCG                                       | 42                | 33      | 52      |
| 06M      | NHS Haringey CCG                                       | 42                | 35      | 51      |
| 01T      | NHS Surrey Downs CCG                                   | 44                | 36      | 52      |
| 15F      | NHS Mid Essex CCG                                      | 45                | 38      | 52      |
| 06F      | NHS Bedfordshire CCG                                   | 45                | 39      | 52      |
| 03M      | NHS South Worcestershire CCG                           | 45                | 38      | 53      |
| 02N      | NHS Airedale, Wharfedale and Craven CCG                | 45                | 35      | 57      |
| 08X      | NHS Wyre Forest CCG                                    | 46                | 33      | 61      |

|     |                                             |    |    |    |
|-----|---------------------------------------------|----|----|----|
| 05L | NHS South West Lincolnshire CCG             | 46 | 35 | 59 |
| 00L | NHS Scarborough and Ryedale CCG             | 46 | 35 | 61 |
| 03Q | NHS West Suffolk CCG                        | 46 | 38 | 56 |
| 00X | NHS Crawley CCG                             | 47 | 35 | 61 |
| 12D | NHS West Essex CCG                          | 47 | 39 | 55 |
| 02T | NHS Canterbury and Coastal CCG              | 47 | 38 | 57 |
| 15D | NHS Eastbourne, Hailsham and Seaford CCG    | 47 | 38 | 58 |
| 05X | NHS West Kent CCG                           | 47 | 41 | 54 |
| 10K | NHS Hambleton, Richmondshire and Whitby CCG | 48 | 37 | 60 |
| 07T | NHS Croydon CCG                             | 48 | 41 | 56 |
| 07G | NHS West Leicestershire CCG                 | 48 | 42 | 55 |
| 09H | NHS Dorset CCG                              | 49 | 44 | 54 |
| 02H | NHS East Berkshire CCG                      | 49 | 43 | 56 |
| 03X | NHS Halton CCG                              | 49 | 38 | 63 |
| 08A | NHS Hartlepool and Stockton-on-Tees CCG     | 50 | 42 | 59 |
| 04D | NHS Newham CCG                              | 50 | 43 | 58 |
| 00P | NHS Waltham Forest CCG                      | 51 | 43 | 60 |
| 01G | NHS South Warwickshire CCG                  | 51 | 43 | 60 |
| 08E | NHS Horsham and Mid Sussex CCG              | 51 | 43 | 61 |
| 10E | NHS West Lancashire CCG                     | 52 | 39 | 67 |
| 03T | NHS Newark and Sherwood CCG                 | 52 | 40 | 67 |
| 10J | NHS Portsmouth CCG                          | 52 | 43 | 63 |
| 08D | NHS High Weald Lewes Havens CCG             | 52 | 42 | 64 |
| 08K | NHS Merton CCG                              | 53 | 43 | 64 |
| 01J | NHS Medway CCG                              | 53 | 45 | 62 |
| 00T | NHS Bradford Districts CCG                  | 53 | 46 | 61 |
| 05F | NHS Isle of Wight CCG                       | 53 | 42 | 67 |
| 03Y | NHS Heywood, Middleton and Rochdale CCG     | 54 | 45 | 65 |
| 07P | NHS Bromley CCG                             | 54 | 46 | 63 |
| 09P | NHS Hull CCG                                | 54 | 46 | 64 |
| 06T | NHS Nottingham West CCG                     | 54 | 41 | 70 |
| 08L | NHS Nene CCG                                | 55 | 49 | 60 |
| 10L | NHS Lincolnshire West CCG                   | 55 | 46 | 65 |
| 09C | NHS Ashford CCG                             | 55 | 43 | 69 |
| 07K | NHS Buckinghamshire CCG                     | 55 | 49 | 62 |
| 01R | NHS Southport and Formby CCG                | 55 | 43 | 71 |
| 09E | NHS City and Hackney CCG                    | 55 | 47 | 65 |
| 05T | NHS Tameside and Glossop CCG                | 56 | 47 | 65 |
| 06Y | NHS Sunderland CCG                          | 56 | 47 | 65 |
| 03E | NHS Hillingdon CCG                          | 56 | 47 | 65 |
| 06P | NHS North Durham CCG                        | 56 | 47 | 66 |
| 00K | NHS Hounslow CCG                            | 56 | 48 | 66 |
| 00Q | NHS Bolton CCG                              | 56 | 48 | 66 |
| 09L | NHS Gloucestershire CCG                     | 57 | 51 | 63 |
| 13T | NHS North West Surrey CCG                   | 57 | 49 | 65 |
| 03J | NHS Redbridge CCG                           | 57 | 49 | 66 |
| 09J | NHS Ealing CCG                              | 58 | 50 | 67 |
| 99C | NHS North Tyneside CCG                      | 58 | 48 | 70 |
| 00D | NHS East Riding of Yorkshire CCG            | 58 | 50 | 67 |
| 08F | NHS Ipswich and East Suffolk CCG            | 59 | 51 | 66 |

|     |                                                           |    |    |     |
|-----|-----------------------------------------------------------|----|----|-----|
| 03V | NHS Dartford, Gravesham and Swanley CCG                   | 59 | 50 | 69  |
| 02D | NHS Wigan Borough CCG                                     | 59 | 51 | 68  |
| 08C | NHS Herts Valleys CCG                                     | 59 | 53 | 66  |
| 11X | NHS Southern Derbyshire CCG                               | 61 | 54 | 68  |
| 05G | NHS Rotherham CCG                                         | 61 | 52 | 71  |
| 06W | NHS Sheffield CCG                                         | 61 | 55 | 68  |
| 07L | NHS Barking and Dagenham CCG                              | 62 | 52 | 73  |
| 10A | NHS Stockport CCG                                         | 62 | 53 | 72  |
| 08G | NHS Knowsley CCG                                          | 64 | 52 | 78  |
| 03F | NHS Lewisham CCG                                          | 65 | 56 | 74  |
| 00Y | NHS South Devon and Torbay CCG                            | 65 | 56 | 75  |
| 01Y | NHS West Hampshire CCG                                    | 65 | 59 | 72  |
| 09X | NHS Lambeth CCG                                           | 66 | 57 | 75  |
| 04Q | NHS Swindon CCG                                           | 66 | 56 | 77  |
| 07N | NHS Blackburn with Darwen CCG                             | 66 | 53 | 80  |
| 00L | NHS Northumberland CCG                                    | 67 | 58 | 76  |
| 07Q | NHS Cambridgeshire and Peterborough CCG                   | 67 | 62 | 73  |
| 15E | NHS Blackpool CCG                                         | 68 | 55 | 83  |
| 04L | NHS Somerset CCG                                          | 68 | 62 | 75  |
| 05H | NHS Coastal West Sussex CCG                               | 68 | 61 | 76  |
| 99A | NHS North Derbyshire CCG                                  | 69 | 59 | 79  |
| 06K | NHS East Surrey CCG                                       | 69 | 57 | 82  |
| 07X | NHS Greenwich CCG                                         | 69 | 60 | 79  |
| 02E | NHS Newcastle Gateshead CCG                               | 69 | 62 | 77  |
| 08P | NHS South Sefton CCG                                      | 70 | 58 | 84  |
| 09Y | NHS Salford CCG                                           | 70 | 60 | 82  |
| 03L | NHS South Tees CCG                                        | 72 | 62 | 83  |
| 07H | NHS North Cumbria CCG                                     | 72 | 63 | 82  |
| 01X | NHS Vale of York CCG                                      | 72 | 64 | 82  |
| 05C | NHS East Leicestershire and Rutland CCG                   | 75 | 66 | 85  |
| 00R | NHS Bradford City CCG                                     | 75 | 58 | 96  |
| 05V | NHS Vale Royal CCG                                        | 76 | 61 | 95  |
| 11M | NHS Hardwick CCG                                          | 76 | 61 | 94  |
| 03D | NHS Herefordshire CCG                                     | 77 | 65 | 90  |
| 99C | NHS Rushcliffe CCG                                        | 78 | 62 | 95  |
| 11J | NHS East Lancashire CCG                                   | 80 | 71 | 90  |
| 99J | NHS Norwich CCG                                           | 81 | 69 | 94  |
| 04K | NHS Shropshire CCG                                        | 81 | 72 | 92  |
| 02W | NHS Brent CCG                                             | 84 | 74 | 94  |
| 08M | NHS Northern, Eastern and Western Devon CCG               | 84 | 78 | 90  |
| 99M | NHS Oldham CCG                                            | 84 | 73 | 96  |
| 07J | NHS Bristol, North Somerset and South Gloucestershire CCG | 84 | 79 | 90  |
| 05L | NHS Sandwell and West Birmingham CCG                      | 85 | 77 | 93  |
| 00M | NHS Surrey Heath CCG                                      | 86 | 68 | 106 |
| 01X | NHS St Helens CCG                                         | 87 | 74 | 102 |
| 09D | NHS Bury CCG                                              | 89 | 76 | 103 |
| 10V | NHS Stafford and Surrounds CCG                            | 90 | 76 | 106 |
| 10C | NHS Warrington CCG                                        | 91 | 79 | 105 |
| 07M | NHS Barnet CCG                                            | 93 | 83 | 103 |

|     |                                      |     |     |     |
|-----|--------------------------------------|-----|-----|-----|
| 04J | NHS Nottingham City CCG              | 93  | 83  | 104 |
| 00V | NHS Cannock Chase CCG                | 93  | 78  | 111 |
| 99H | NHS Wandsworth CCG                   | 94  | 83  | 105 |
| 01V | NHS Tower Hamlets CCG                | 94  | 84  | 106 |
| 08J | NHS Mansfield and Ashfield CCG       | 97  | 84  | 112 |
| 02R | NHS Brighton and Hove CCG            | 98  | 86  | 110 |
| 06N | NHS Islington CCG                    | 98  | 86  | 111 |
| 02X | NHS East and North Hertfordshire CCG | 100 | 92  | 108 |
| 04M | NHS South Cheshire CCG               | 100 | 86  | 116 |
| 99N | NHS Leeds CCG                        | 101 | 94  | 108 |
| 02F | NHS Guildford and Waverley CCG       | 104 | 91  | 119 |
| 01W | NHS Wakefield CCG                    | 104 | 94  | 116 |
| 15C | NHS Calderdale CCG                   | 105 | 92  | 120 |
| 99G | NHS Thanet CCG                       | 107 | 90  | 125 |
| 08Q | NHS Trafford CCG                     | 107 | 95  | 122 |
| 03A | NHS Harrogate and Rural District CCG | 108 | 93  | 125 |
| 03K | NHS Redditch and Bromsgrove CCG      | 108 | 94  | 124 |
| 03R | NHS Wiltshire CCG                    | 112 | 103 | 122 |
| 07R | NHS Central London (Westminster) CCG | 112 | 97  | 129 |
| 03H | NHS Oxfordshire CCG                  | 112 | 105 | 121 |
| 99K | NHS Kingston CCG                     | 113 | 98  | 130 |
| 15A | NHS Berkshire West CCG               | 116 | 106 | 125 |
| 09G | NHS Darlington CCG                   | 118 | 98  | 140 |
| 01A | NHS Eastern Cheshire CCG             | 120 | 105 | 136 |
| 01E | NHS Harrow CCG                       | 122 | 109 | 137 |
| 01D | NHS Kernow CCG                       | 125 | 116 | 135 |
| 04C | NHS Milton Keynes CCG                | 126 | 113 | 140 |
| 00N | NHS Sutton CCG                       | 126 | 111 | 143 |
| 05Y | NHS Wirral CCG                       | 128 | 116 | 141 |
| 06V | NHS Richmond CCG                     | 133 | 117 | 150 |
| 06A | NHS Greater Preston CCG              | 134 | 118 | 151 |
| 06Q | NHS North Kirklees CCG               | 137 | 121 | 155 |
| 07W | NHS East Staffordshire CCG           | 140 | 120 | 162 |
| 07Y | NHS Leicester City CCG               | 148 | 136 | 161 |
| 04G | NHS North Staffordshire CCG          | 155 | 139 | 172 |
| 10D | NHS West Cheshire CCG                | 160 | 144 | 177 |
| 04V | NHS Birmingham and Solihull CCG      | 160 | 153 | 167 |
| 08H | NHS Liverpool CCG                    | 163 | 152 | 174 |
| 07V | NHS Dudley CCG                       | 165 | 151 | 179 |
| 08V | NHS West London CCG                  | 166 | 149 | 184 |
| 04Y | NHS Chorley and South Ribble CCG     | 171 | 152 | 191 |
| 08W | NHS Wolverhampton CCG                | 172 | 156 | 189 |
| 99D | NHS Stoke on Trent CCG               | 199 | 182 | 217 |
| 14Y | NHS Camden CCG                       | 201 | 183 | 219 |
| 08C | NHS Hammersmith and Fulham CCG       | 204 | 184 | 226 |
| 11N | NHS Luton CCG                        | 242 | 222 | 264 |
| 01C | NHS Greater Huddersfield CCG         | 245 | 226 | 265 |
| 11A | NHS Manchester CCG                   | 253 | 240 | 267 |
| 03N | NHS Southampton CCG                  | 270 | 250 | 291 |
| 99Q | NHS Southwark CCG                    | 324 | 305 | 345 |

|     |                                      |     |     |     |
|-----|--------------------------------------|-----|-----|-----|
| 11E | NHS Bath and North East Somerset CCG | 458 | 428 | 490 |
|-----|--------------------------------------|-----|-----|-----|
