# Supplementary material for: Demographic, Knowledge and Impact Analysis of 57,627 Antibiotic Guardians Who Have Pledged to Contribute to Tackling Antimicrobial Resistance
Source: MDPI journal article supplement (doi:10.3390/antibiotics8010021), 2019-03-09
Supplement: s1 [file s1]

**S2 Table.** Antibiotic Guardian rate by local authority per 100,000 population with 95% confidence intervals

| Local Authority              | Rate Per 100,000 | LowerCI | UpperCI |
|------------------------------|------------------|---------|---------|
| Adur                         | 52               | 36      | 73      |
| Allerdale                    | 46               | 34      | 62      |
| Amber Valley                 | 27               | 19      | 38      |
| Arun                         | 57               | 46      | 70      |
| Ashfield                     | 143              | 123     | 166     |
| Ashford                      | 55               | 43      | 69      |
| Aylesbury Vale               | 48               | 39      | 59      |
| Babergh                      | 22               | 13      | 34      |
| Barking and Dagenham         | 33               | 26      | 42      |
| Barnet                       | 120              | 110     | 132     |
| Barnsley                     | 39               | 32      | 48      |
| Barrow-in-Furness            | 33               | 21      | 50      |
| Basildon                     | 27               | 20      | 35      |
| Basingstoke and Deane        | 38               | 30      | 49      |
| Bassetlaw                    | 69               | 55      | 86      |
| Bath and North East Somerset | 458              | 428     | 490     |
| Bedford                      | 50               | 40      | 62      |
| Bexley                       | 36               | 29      | 44      |
| Birmingham                   | 185              | 177     | 193     |
| Blaby                        | 126              | 105     | 150     |
| Blackburn with Darwen        | 66               | 53      | 80      |
| Blackpool                    | 68               | 55      | 83      |
| Bolsover                     | 143              | 118     | 172     |
| Bolton                       | 48               | 41      | 57      |
| Boston                       | 29               | 18      | 45      |
| Bournemouth                  | 49               | 39      | 60      |
| Bracknell Forest             | 38               | 28      | 51      |
| Bradford                     | 51               | 45      | 57      |
| Braintree                    | 28               | 20      | 37      |
| Breckland                    | 17               | 11      | 26      |
| Brent                        | 41               | 34      | 48      |
| Brentwood                    | 46               | 32      | 64      |
| Brighton and Hove            | 98               | 87      | 110     |
| Bristol, City of             | 111              | 101     | 121     |
| Broadland                    | 42               | 32      | 55      |
| Bromley                      | 52               | 45      | 61      |
| Bromsgrove                   | 70               | 54      | 88      |
| Broxbourne                   | 65               | 50      | 83      |
| Broxtowe                     | 16               | 9       | 25      |
| Burnley                      | 40               | 28      | 56      |
| Bury                         | 100              | 86      | 116     |
| Calderdale                   | 105              | 92      | 120     |
| Cambridge                    | 82               | 67      | 99      |
| Camden                       | 242              | 224     | 262     |

|                           |     |     |     |
|---------------------------|-----|-----|-----|
| Cannock Chase             | 63  | 48  | 80  |
| Canterbury                | 53  | 42  | 65  |
| Carlisle                  | 45  | 33  | 60  |
| Castle Point              | 9   | 4   | 18  |
| Central Bedfordshire      | 44  | 37  | 52  |
| Charnwood                 | 117 | 102 | 134 |
| Chelmsford                | 69  | 57  | 82  |
| Cheltenham                | 77  | 62  | 94  |
| Cherwell                  | 57  | 45  | 70  |
| Cheshire East             | 112 | 102 | 123 |
| Cheshire West and Chester | 132 | 120 | 145 |
| Chesterfield              | 34  | 24  | 48  |
| Chichester                | 86  | 70  | 104 |
| Chiltern                  | 57  | 43  | 74  |
| Chorley                   | 46  | 34  | 60  |
| Christchurch              | 18  | 8   | 34  |
| City of London            | 314 | 201 | 467 |
| Colchester                | 51  | 41  | 62  |
| Copeland                  | 23  | 13  | 38  |
| Corby                     | 30  | 19  | 46  |
| Cornwall                  | 122 | 113 | 132 |
| Cotswold                  | 48  | 35  | 65  |
| County Durham             | 43  | 38  | 49  |
| Coventry                  | 41  | 34  | 48  |
| Craven                    | 67  | 48  | 92  |
| Crawley                   | 47  | 35  | 61  |
| Croydon                   | 45  | 39  | 53  |
| Dacorum                   | 28  | 20  | 38  |
| Darlington                | 138 | 117 | 162 |
| Dartford                  | 100 | 82  | 121 |
| Daventry                  | 13  | 7   | 24  |
| Derby                     | 64  | 54  | 74  |
| Derbyshire Dales          | 111 | 88  | 139 |
| Doncaster                 | 35  | 29  | 43  |
| Dover                     | 28  | 19  | 39  |
| Dudley                    | 147 | 134 | 161 |
| Ealing                    | 60  | 52  | 69  |
| East Cambridgeshire       | 86  | 67  | 107 |
| East Devon                | 44  | 34  | 57  |
| East Dorset               | 29  | 19  | 43  |
| East Hampshire            | 37  | 27  | 49  |
| East Hertfordshire        | 60  | 48  | 74  |
| East Lindsey              | 46  | 35  | 58  |
| East Northamptonshire     | 6   | 2   | 14  |
| East Riding of Yorkshire  | 55  | 47  | 64  |
| East Staffordshire        | 171 | 148 | 196 |
| Eastbourne                | 54  | 41  | 70  |
| Eastleigh                 | 35  | 26  | 47  |
| Eden                      | 53  | 35  | 77  |
| Elmbridge                 | 33  | 24  | 44  |

|                              |     |     |     |
|------------------------------|-----|-----|-----|
| Enfield                      | 38  | 32  | 46  |
| Epping Forest                | 44  | 34  | 57  |
| Epsom and Ewell              | 76  | 58  | 97  |
| Erewash                      | 17  | 11  | 27  |
| Exeter                       | 148 | 128 | 171 |
| Fareham                      | 52  | 40  | 67  |
| Fenland                      | 32  | 22  | 45  |
| Forest Heath                 | 11  | 4   | 22  |
| Forest of Dean               | 52  | 38  | 70  |
| Fylde                        | 24  | 15  | 38  |
| Gateshead                    | 31  | 23  | 39  |
| Gedling                      | 33  | 24  | 46  |
| Gloucester                   | 67  | 54  | 83  |
| Gosport                      | 32  | 21  | 46  |
| Gravesham                    | 50  | 37  | 65  |
| Great Yarmouth               | 27  | 18  | 40  |
| Greenwich                    | 57  | 49  | 67  |
| Guildford                    | 120 | 103 | 140 |
| Hackney                      | 64  | 55  | 74  |
| Halton                       | 49  | 38  | 63  |
| Hambleton                    | 56  | 42  | 74  |
| Hammersmith and Fulham       | 186 | 167 | 207 |
| Harborough                   | 49  | 36  | 66  |
| Haringey                     | 42  | 35  | 51  |
| Harlow                       | 50  | 36  | 67  |
| Harrogate                    | 104 | 89  | 121 |
| Harrow                       | 120 | 107 | 134 |
| Hart                         | 37  | 26  | 51  |
| Hartlepool                   | 35  | 24  | 50  |
| Hastings                     | 50  | 36  | 66  |
| Havant                       | 38  | 28  | 51  |
| Havering                     | 51  | 43  | 61  |
| Herefordshire, County of     | 85  | 72  | 99  |
| Hertsmere                    | 37  | 26  | 50  |
| High Peak                    | 52  | 38  | 69  |
| Hillingdon                   | 51  | 44  | 60  |
| Hinckley and Bosworth        | 24  | 16  | 35  |
| Horsham                      | 49  | 38  | 62  |
| Hounslow                     | 59  | 51  | 69  |
| Huntingdonshire              | 74  | 62  | 88  |
| Hyndburn                     | 179 | 151 | 211 |
| Ipswich                      | 91  | 76  | 108 |
| Isle of Wight                | 53  | 42  | 67  |
| Isles of Scilly              | 133 | 27  | 388 |
| Islington                    | 72  | 61  | 84  |
| Kensington and Chelsea       | 162 | 142 | 183 |
| Kettering                    | 97  | 78  | 118 |
| King's Lynn and West Norfolk | 24  | 17  | 33  |
| Kingston upon Hull, City of  | 56  | 48  | 66  |
| Kingston upon Thames         | 104 | 90  | 121 |

|                           |     |     |     |
|---------------------------|-----|-----|-----|
| Kirklees                  | 198 | 185 | 211 |
| Knowsley                  | 69  | 57  | 84  |
| Lambeth                   | 79  | 70  | 90  |
| Lancaster                 | 64  | 51  | 78  |
| Leeds                     | 104 | 97  | 111 |
| Leicester                 | 125 | 114 | 138 |
| Lewes                     | 63  | 48  | 80  |
| Lewisham                  | 70  | 61  | 80  |
| Lichfield                 | 56  | 43  | 72  |
| Lincoln                   | 101 | 82  | 122 |
| Liverpool                 | 135 | 125 | 145 |
| Luton                     | 242 | 222 | 264 |
| Maidstone                 | 61  | 50  | 74  |
| Maldon                    | 27  | 15  | 43  |
| Malvern Hills             | 35  | 23  | 51  |
| Manchester                | 261 | 247 | 275 |
| Mansfield                 | 23  | 15  | 34  |
| Medway                    | 48  | 40  | 57  |
| Melton                    | 108 | 81  | 141 |
| Mendip                    | 95  | 78  | 115 |
| Merton                    | 53  | 43  | 64  |
| Mid Devon                 | 41  | 28  | 57  |
| Mid Suffolk               | 34  | 24  | 48  |
| Mid Sussex                | 45  | 35  | 57  |
| Middlesbrough             | 108 | 92  | 127 |
| Milton Keynes             | 124 | 111 | 138 |
| Mole Valley               | 48  | 35  | 65  |
| New Forest                | 67  | 56  | 81  |
| Newark and Sherwood       | 31  | 22  | 42  |
| Newcastle upon Tyne       | 96  | 85  | 107 |
| Newcastle-under-Lyme      | 179 | 157 | 204 |
| Newham                    | 25  | 20  | 31  |
| North Devon               | 175 | 149 | 204 |
| North Dorset              | 58  | 41  | 78  |
| North East Derbyshire     | 68  | 53  | 87  |
| North East Lincolnshire   | 31  | 23  | 41  |
| North Hertfordshire       | 64  | 51  | 79  |
| North Kesteven            | 17  | 11  | 27  |
| North Lincolnshire        | 37  | 28  | 47  |
| North Norfolk             | 17  | 10  | 27  |
| North Somerset            | 93  | 80  | 106 |
| North Tyneside            | 58  | 48  | 70  |
| North Warwickshire        | 16  | 7   | 29  |
| North West Leicestershire | 77  | 61  | 96  |
| Northampton               | 81  | 69  | 93  |
| Northumberland            | 70  | 61  | 80  |
| Norwich                   | 92  | 77  | 109 |
| Nottingham                | 104 | 93  | 116 |
| Nuneaton and Bedworth     | 44  | 34  | 57  |
| Oadby and Wigston         | 46  | 30  | 67  |

|                        |     |     |     |
|------------------------|-----|-----|-----|
| Oldham                 | 87  | 76  | 100 |
| Oxford                 | 295 | 269 | 323 |
| Pendle                 | 73  | 56  | 93  |
| Peterborough           | 40  | 32  | 50  |
| Plymouth               | 77  | 67  | 89  |
| Poole                  | 67  | 54  | 81  |
| Portsmouth             | 52  | 43  | 63  |
| Preston                | 205 | 182 | 230 |
| Purbeck                | 28  | 15  | 48  |
| Reading                | 245 | 222 | 271 |
| Redbridge              | 79  | 69  | 90  |
| Redcar and Cleveland   | 35  | 26  | 47  |
| Redditch               | 29  | 19  | 43  |
| Reigate and Banstead   | 94  | 79  | 111 |
| Ribble Valley          | 50  | 34  | 72  |
| Richmond upon Thames   | 126 | 110 | 142 |
| Richmondshire          | 41  | 26  | 62  |
| Rochdale               | 54  | 45  | 65  |
| Rochford               | 9   | 4   | 18  |
| Rossendale             | 38  | 25  | 56  |
| Rother                 | 27  | 18  | 40  |
| Rotherham              | 48  | 40  | 57  |
| Rugby                  | 22  | 14  | 32  |
| Runnymede              | 87  | 69  | 109 |
| Rushcliffe             | 21  | 13  | 31  |
| Rushmoor               | 58  | 44  | 76  |
| Rutland                | 58  | 37  | 87  |
| Ryedale                | 28  | 15  | 46  |
| Salford                | 77  | 67  | 89  |
| Sandwell               | 64  | 56  | 74  |
| Scarborough            | 44  | 33  | 59  |
| Sedgemoor              | 32  | 23  | 44  |
| Sefton                 | 101 | 89  | 113 |
| Selby                  | 16  | 9   | 27  |
| Sevenoaks              | 42  | 31  | 55  |
| Sheffield              | 65  | 59  | 72  |
| Shepway                | 42  | 31  | 56  |
| Shropshire             | 81  | 71  | 91  |
| Slough                 | 30  | 22  | 40  |
| Solihull               | 57  | 47  | 68  |
| South Bucks            | 63  | 46  | 85  |
| South Cambridgeshire   | 123 | 106 | 142 |
| South Derbyshire       | 52  | 39  | 68  |
| South Gloucestershire  | 42  | 34  | 50  |
| South Hams             | 33  | 22  | 47  |
| South Holland          | 16  | 9   | 27  |
| South Kesteven         | 41  | 31  | 53  |
| South Lakeland         | 66  | 51  | 84  |
| South Norfolk          | 51  | 40  | 64  |
| South Northamptonshire | 43  | 30  | 59  |

|                         |     |     |     |
|-------------------------|-----|-----|-----|
| South Oxfordshire       | 42  | 32  | 54  |
| South Ribble            | 224 | 197 | 253 |
| South Somerset          | 67  | 55  | 81  |
| South Staffordshire     | 72  | 57  | 90  |
| South Tyneside          | 31  | 23  | 41  |
| Southampton             | 270 | 250 | 291 |
| Southend-on-Sea         | 42  | 33  | 52  |
| Southwark               | 306 | 286 | 325 |
| Spelthorne              | 26  | 17  | 38  |
| St Albans               | 58  | 47  | 72  |
| St Edmundsbury          | 50  | 38  | 65  |
| St. Helens              | 103 | 88  | 119 |
| Stafford                | 98  | 82  | 116 |
| Staffordshire Moorlands | 98  | 80  | 120 |
| Stevenage               | 206 | 177 | 239 |
| Stockport               | 74  | 65  | 85  |
| Stockton-on-Tees        | 56  | 46  | 68  |
| Stoke-on-Trent          | 210 | 192 | 228 |
| Stratford-on-Avon       | 23  | 16  | 33  |
| Stroud                  | 50  | 38  | 64  |
| Suffolk Coastal         | 36  | 27  | 48  |
| Sunderland              | 56  | 47  | 65  |
| Surrey Heath            | 83  | 65  | 105 |
| Sutton                  | 126 | 111 | 143 |
| Swale                   | 31  | 22  | 41  |
| Swindon                 | 54  | 45  | 65  |
| Tameside                | 56  | 46  | 66  |
| Tamworth                | 42  | 29  | 59  |
| Tandridge               | 19  | 11  | 31  |
| Taunton Deane           | 91  | 75  | 110 |
| Teignbridge             | 37  | 27  | 48  |
| Telford and Wrekin      | 40  | 31  | 50  |
| Tendring                | 19  | 13  | 28  |
| Test Valley             | 87  | 71  | 105 |
| Tewkesbury              | 34  | 23  | 49  |
| Thanet                  | 107 | 90  | 125 |
| Three Rivers            | 51  | 37  | 67  |
| Thurrock                | 23  | 16  | 31  |
| Tonbridge and Malling   | 53  | 41  | 67  |
| Torbay                  | 86  | 71  | 103 |
| Torridge                | 60  | 43  | 82  |
| Tower Hamlets           | 107 | 96  | 120 |
| Trafford                | 63  | 53  | 74  |
| Tunbridge Wells         | 28  | 19  | 39  |
| Uttlesford              | 41  | 29  | 57  |
| Vale of White Horse     | 69  | 55  | 84  |
| Wakefield               | 97  | 86  | 108 |
| Walsall                 | 52  | 44  | 61  |
| Waltham Forest          | 45  | 38  | 54  |
| Wandsworth              | 73  | 64  | 83  |

|                        |     |     |     |
|------------------------|-----|-----|-----|
| Warrington             | 97  | 84  | 112 |
| Warwick                | 76  | 62  | 91  |
| Watford                | 154 | 130 | 181 |
| Waveney                | 25  | 17  | 36  |
| Waverley               | 54  | 42  | 68  |
| Wealden                | 47  | 37  | 59  |
| Wellingborough         | 35  | 24  | 51  |
| Welwyn Hatfield        | 108 | 90  | 128 |
| West Berkshire         | 38  | 29  | 49  |
| West Devon             | 87  | 64  | 115 |
| West Dorset            | 65  | 50  | 82  |
| West Lancashire        | 52  | 39  | 67  |
| West Lindsey           | 3   | 1   | 9   |
| West Oxfordshire       | 57  | 44  | 73  |
| West Somerset          | 26  | 12  | 49  |
| Westminster            | 133 | 119 | 148 |
| Weymouth and Portland  | 18  | 9   | 32  |
| Wigan                  | 59  | 51  | 68  |
| Wiltshire              | 113 | 104 | 123 |
| Winchester             | 70  | 56  | 87  |
| Windsor and Maidenhead | 76  | 63  | 91  |
| Wirral                 | 128 | 116 | 141 |
| Woking                 | 62  | 48  | 80  |
| Wokingham              | 58  | 47  | 70  |
| Wolverhampton          | 151 | 137 | 167 |
| Worcester              | 60  | 46  | 77  |
| Worthing               | 73  | 58  | 91  |
| Wychavon               | 64  | 51  | 79  |
| Wycombe                | 38  | 30  | 49  |
| Wyre                   | 27  | 18  | 39  |
| Wyre Forest            | 37  | 26  | 51  |
| York                   | 93  | 80  | 107 |
